# Supplementary material for: Crk proteins transduce FGF signaling to promote lens fiber cell elongation
Source: eLife. 2018 Jan 23;7:e32586. doi: 10.7554/eLife.32586 (PMC5818251; doi:10.7554/eLife.32586)
Supplement: Figure 2—source data 1. [file elife-32586-fig2-data1.xlsx]

## Sheet: Sheet1
BrdU positive cells/DAPI positive cells
WT	Le-Cre;Crkf/f CrkLf/f
0.65	0.46
0.67	0.5
0.67	0.45
0.66	0.54
TUNEL positive cells/DAPI positive cells
WT	Le-Cre;Crkf/f CrkLf/f
0	33
0.9	45
0	36
0	21
