# Supplementary material for: Crk proteins transduce FGF signaling to promote lens fiber cell elongation
Source: eLife. 2018 Jan 23;7:e32586. doi: 10.7554/eLife.32586 (PMC5818251; doi:10.7554/eLife.32586)
Supplement: Figure 4—source data 1. [file elife-32586-fig4-data1.xlsx]

## Sheet: Sheet1
Fiber cell length
WT	Le-Cre;Crkf/fCrklf/f	Le-Cre;Crkf/fCrklf/f ;Tg-FGF3	Tg-FGF3	Le-Cre;Crkf/fCrkLf/fKras
535.345	272.813	384.019	730.566	449.846
594.519	345.971	314.718	662.628	521.638
513.002	325.078	332.302	688.568	582.118
