# Supplementary material for: Crk proteins transduce FGF signaling to promote lens fiber cell elongation
Source: eLife. 2018 Jan 23;7:e32586. doi: 10.7554/eLife.32586 (PMC5818251; doi:10.7554/eLife.32586)
Supplement: Figure 6—source data 1. [file elife-32586-fig6-data1.xlsx]

## Sheet: Sheet1
Fiber cell length
WT	Le-Cre;Rac1/f/fRac2f/f	Le-Cre;Rac1/2f/fRap1a/bf/f	Le-Cre;Crkf/fCrklf/f	Le-Cre;Crkf/fCrklf/fRac1CA
517.391	432.483	425.513	272.813	411.736
604.961	421.946	430.589	345.971	391.423
590.427	438.41	418.254	325.078	402.72
