# Supplementary material for: Crk proteins transduce FGF signaling to promote lens fiber cell elongation
Source: eLife. 2018 Jan 23;7:e32586. doi: 10.7554/eLife.32586 (PMC5818251; doi:10.7554/eLife.32586)
Supplement: Supplementary file 1. [file elife-32586-supp1.xlsx]

## Sheet: Sheet1
Parental cross		Experimental progeny
Sire genotype	Dam genotype	Progeny genotype	Designation
Pax6Le-Cre	+/+	Pax6Le-Cre	Control
Pax6Le-Cre	Crkflox/flox;CrkLflox/flox	Pax6Le-Cre;Crkflox/+;CrkLflox/+	Control
Pax6Le-Cre;Crkflox/flox	Crkflox/flox	Pax6Le-Cre;Crkflox/flox	Pax6Le-Cre;Crkf/f
Pax6Le-Cre;CrkLflox/flox	CrkLflox/flox	Pax6Le-Cre;CrkLflox/flox	Pax6Le-Cre;CrkLf/f
Pax6Le-Cre;Crkflox/flox;CrkLflox/flox	Crkflox/flox;CrkLflox/flox	Pax6Le-Cre;Crkflox/flox;CrkLflox/flox	CrkCKO
Pax6Le-Cre;Crkflox/flox;CrkLflox/flox	Crkflox/flox;CrkLflox/flox;Fgf3OVE393	Pax6Le-Cre;Crkflox/flox;CrkLflox/flox;Fgf3OVE393	CrkCKO;Fgf3OVE393
		Crkflox/flox;CrkLflox/flox;Fgf3OVE393	Fgf3OVE393
Pax6Le-Cre;Crkflox/flox;CrkLflox/flox	Crkflox/flox;CrkLflox/flox;Fgf3OVE391	Pax6Le-Cre;Crkflox/flox;CrkLflox/flox;Fgf3OVE391	CrkCKO;Fgf3OVE391
		Crkflox/flox;CrkLflox/flox;Fgf3OVE391	Fgf3OVE391
Pax6Le-Cre;Fgfr1flox/ΔFrs;Fgfr2flox/flox	Fgfr1flox/flox;Fgfr2flox/flox	Pax6Le-Cre;Fgfr1flox/flox;Fgfr2flox/flox	FgfrCKO
		Pax6Le-Cre;Fgfr1flox/ΔFrs;Fgfr2flox/flox	Pax6Le-Cre;Fgfr1f/ΔFrs;Fgfr2f/f
Pax6Le-Cre;Fgfr1Crk/+;Fgfr2flox/flox;Fgfr2flox/flox;Fgfr4-/-	Fgfr1Crk/Crk;Fgfr2flox/flox;Fgfr2flox/flox;Fgfr4-/-	Pax6Le-Cre;Fgfr1Crk/+;Fgfr2flox/flox;Fgfr2flox/flox;Fgfr4-/-	Pax6Le-Cre;Fgfr1Crk/+;Fgfr2f/f;Fgfr2f/f;Fgfr4-/-
		Pax6Le-Cre;Fgfr1Crk/Crk;Fgfr2flox/flox;Fgfr2flox/flox;Fgfr4-/-	Pax6Le-Cre;Fgfr1Crk/Crk;Fgfr2f/f;Fgfr2f/f;Fgfr4-/-
Pax6Le-Cre;Shp2floxflox	Shp2floxflox	Pax6Le-Cre;Shp2floxflox	SHP2CKO
Pax6Le-Cre;Frs2flox/floxs;Shp2floxflox	Frs2flox/floxs;Shp2floxflox	Pax6Le-Cre;Frs2flox/floxs;Shp2floxflox	FRS2CKO;Shp2CKO
Pax6Le-Cre;Crkflox/flox;CrkLflox/flox; Shp2flox/flox	Crkflox/flox;CrkLflox/flox; Shp2flox/flox	Pax6Le-Cre;Crkflox/flox;CrkLflox/flox; Shp2flox/flox	CrkCKO; Shp2CKO
Pax6Le-Cre;Rac1flox/flox;Rac2-/-	Rac1flox/flox;Rac2-/-	Pax6Le-Cre;Rac1flox/flox;Rac2-/-	RacCKO
Pax6Le-Cre;Crkflox/flox;CrkLflox/flox	Crkflox/flox;CrkLflox/flox;Rac1LSL-G12V	Pax6Le-Cre;Crkflox/flox;CrkLflox/flox;Rac1LSL-G12V	CrkCKO;Rac1CA
Pax6Le-Cre;Rap1aflox/flox;Rap1bflox/flox	Rap1aflox/flox;Rap1bflox/flox	Pax6Le-Cre;Rap1aflox/flox;Rap1bflox/flox	Rap1CKO
Pax6Le-Cre;Rac1flox/flox;Rac2-/- ;Rap1aflox/flox;Rap1bflox/flox	Rac1flox/flox;Rac2-/- ;Rap1aflox/flox;Rap1bflox/flox	Pax6Le-Cre;Rac1flox/flox;Rac2-/- ;Rap1aflox/flox;Rap1bflox/flox	RacCKO; Rap1CKO
Pax6Le-Cre;Crkflox/flox;CrkLflox/flox	Crk flox/flox ;CrkL flox/flox ;KrasLSL-G12D	Pax6Le-Cre; Crk flox/flox ;CrkL flox/flox ;KrasLSL-G12D	CrkCKO;KrasG12D
