# Supplementary figures and images for: Crk proteins transduce FGF signaling to promote lens fiber cell elongation
Source: eLife journal article supplement (doi:10.7554/elife.32586), 2018-01-23

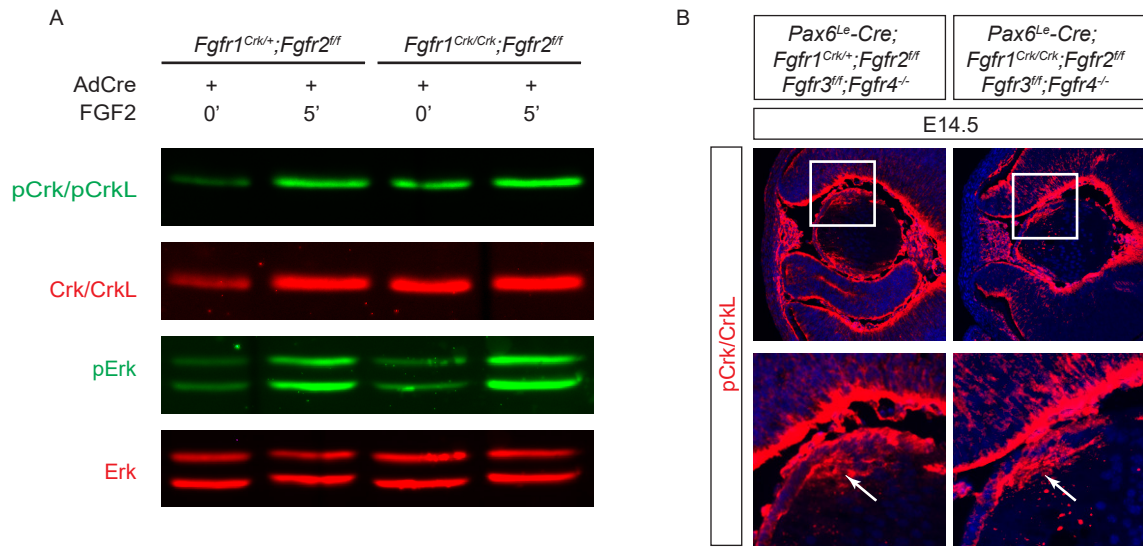

Figure 3 - figure supplement 1

Supplement: supp [file elife-32586-supp-v1.zip]

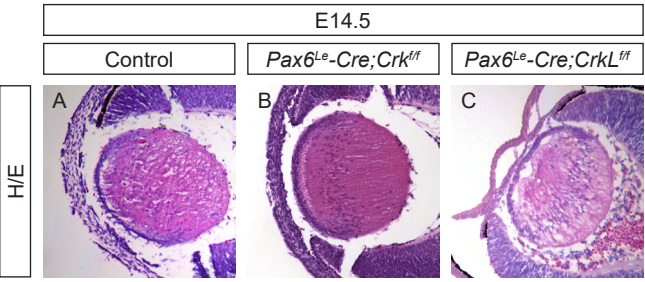

Figure 1 - figure supplement 1

Supplement: supp [file elife-32586-supp-v1.zip]
